# Supplementary material for: BuscoPhylo: a webserver for Busco-based phylogenomic analysis for non-specialists
Source: PubMed Central journal article supplement (PMC9576783; doi:10.1038/s41598-022-22461-0), 2022-10-17
Supplement: 41598_2022_22461_MOESM1_ESM.pdf [file 41598_2022_22461_MOESM1_ESM.pdf]

## **Supplementary Data: Supplementary Tables and Figures**

### **BuscoPhylo: A webserver for Busco-based Phylogenomic Analysis for Non-specialists**

Alae-Eddine Sahbo<sup>1</sup>, Driss Iraqi, Rachid Mentag, Slimane KHAYI

Content

Supplementary Figures S1-S2

Supplementary Table S1

## Phylogenomics analysis pipeline by BuscoPhylo

### Project Details

- **Name** : Dickeya
- **Job ID** : 1660667670
- **Lineage** : enterobacterales\_odb10
- **Mode** : genome
- **Run time** : 31 min 3 s
- **363** BUSCOs are single copy in all **36** species

### Method

- BUSCO searches was performed on each genome using BUSCO V5 (Simão et al., 2015).
  - Alignments was performed using Muscle and trimAl (Edgar, 2004; Capella-Gutiérrez et al., 2009).
  - ML tree was inferred using IQ-TREE version 1.6.12 (Nguyen et al., 2015) with the model selection from ModeFinder (Kalyaanamoorthy et al., 2017) using the following defaults parameters: "-bb 1000 -alt 1000 -nt AUTO -nmax".
  - The tree file is visualized using ETE Toolkit (Huerta-Cepas et al., 2016).
- (These texts may be used for your publication.)

### Result files

- [Download image \(SVG\)](#)
[Download image \(PNG\)](#)
[Download pdf](#)
[Download Result \(346MB\)](#)
- [Download log](#)

### Phylogram

- disable bootstrap
  disable branch length

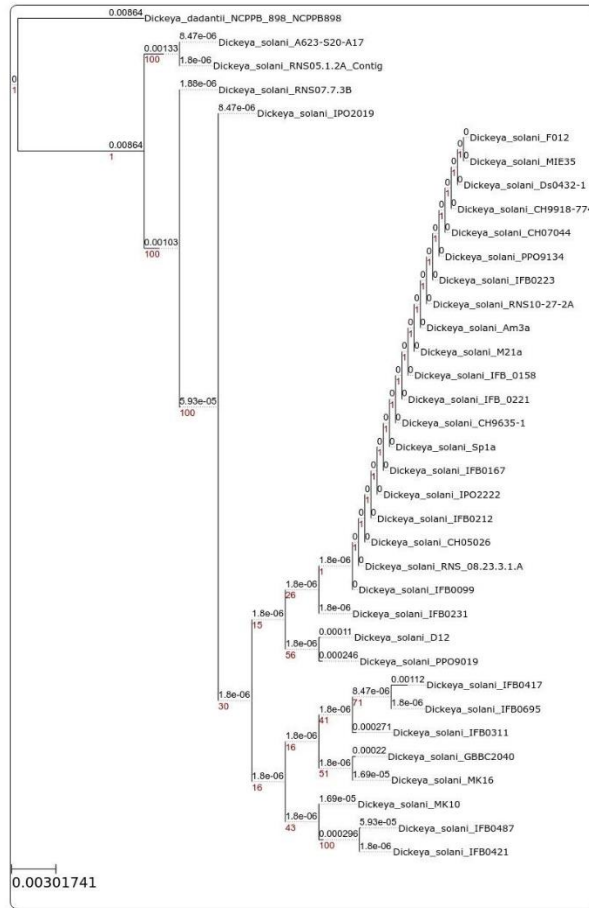

**Supplementary Figure S1** BuscoPhylo output screenshot for *Dickeya solani* project. The entire result is accessible through the following URL: <https://buscophylo.inra.org.ma/item/1660667670/Dickeya>

## Phylogenomics analysis pipeline by BuscoPhylo

### Project Details

- **Name** : Fusarium
- **Job ID** : 1663056926
- **Lineage** : sordariomycetes\_odb10
- **Mode** : genome
- **Run time** : 16 h 55 min 20 s
- **3409** BUSCOs are single copy in all **21** species

### Method

- BUSCO searches was performed on each genome using BUSCO V5 (Simão et al., 2015).
  - Alignments was performed using Muscle and trimAl (Edgar, 2004; Capella-Gutiérrez et al., 2009).
  - ML tree was inferred using IQ-TREE version 1.6.12 (Nguyen et al., 2015) with the model selection from ModelFinder (Kalyaanamoorthy et al., 2017) using the following defaults parameters: "-bb 1000 -alrt 1000 -nt AUTO -ntmax".
  - The tree file is visualized using ETE Toolkit (Huerta-Cepas et al., 2016).
- (These texts may be used for your publication.)

### Result files

- [Download image \(SVG\)](#)
[Download image \(PNG\)](#)
[Download pdf](#)
[Download Result \(1954MB\)](#)
- [Download log](#)

### Phylogram

- disable bootstrap
  disable branch length

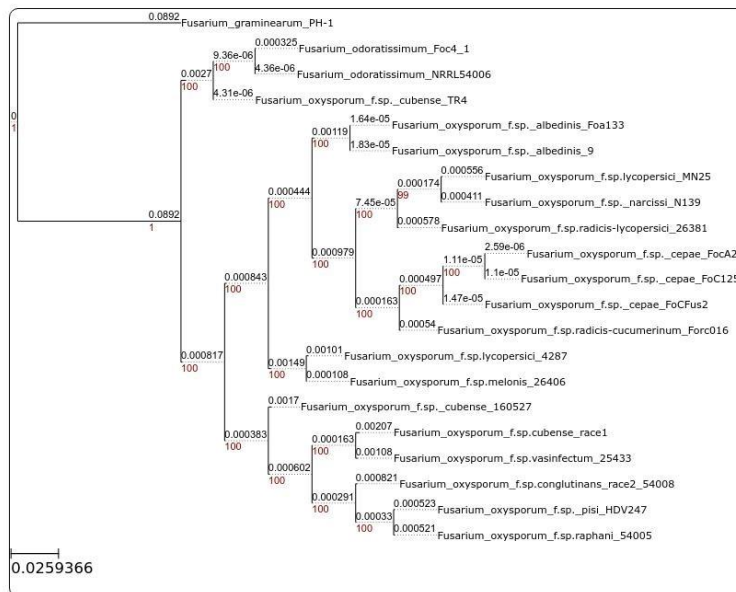

Supplementary Figure S2 BuscoPhylo output screenshot for *Fusarium oxysporum* project. The entire result is accessible through the following URL:  
<https://buscophylo.inra.org.ma/item/1663056926/Fusarium>

**Supplementary Table S1** : The list of the organisms and their accession numbers used to assess BuscoPhylo performances

| Domain                                  | Species                                                                    | Accession          |
|-----------------------------------------|----------------------------------------------------------------------------|--------------------|
| Eukaryote                               | <i>Fusarium oxysporum</i> f. sp. <i>albedinis</i> 9                        | JAKELM010000000    |
|                                         | <i>Fusarium oxysporum</i> f. sp. <i>albedinis</i> Foa133                   | JAAVJG010000000    |
|                                         | <i>Fusarium oxysporum</i> f. sp. <i>lycopersici</i> 4287                   | AAXH010000000      |
|                                         | <i>Fusarium oxysporum</i> f. sp. <i>lycopersici</i> MN25                   | AGBH010000000      |
|                                         | <i>Fusarium oxysporum</i> f. sp. <i>lisi</i> HDV247                        | AGBI010000000      |
|                                         | <i>Fusarium oxysporum</i> f. sp. <i>radicis-lycopersici</i> 26381          | AGNB010000000      |
|                                         | <i>Fusarium oxysporum</i> f. sp. <i>vasinfectum</i> 25433                  | AGNC010000000      |
|                                         | <i>Fusarium oxysporum</i> f. sp. <i>cubense</i> tropical race 4 54006      | AGND010000000      |
|                                         | <i>Fusarium oxysporum</i> f. sp. <i>conglutinans</i> race 2 54008          | AGNF010000000      |
|                                         | <i>Fusarium oxysporum</i> f. sp. <i>raphani</i> 54005                      | AGNG010000000      |
|                                         | <i>Fusarium oxysporum</i> f. sp. <i>melonis</i> 26406                      | AGNE010000000      |
|                                         | <i>Fusarium oxysporum</i> f. sp. <i>cubense</i> race 1                     | AMGP010000000      |
|                                         | <i>Fusarium oxysporum</i> f. sp. <i>cubense</i> race 4                     | AMGQ010000000      |
|                                         | <i>Fusarium oxysporum</i> f. sp. <i>radicis-cucumerinum</i> strain Forc016 | MABQ020000000      |
|                                         | <i>Fusarium oxysporum</i> f. sp. <i>cepae</i> strain FoCA23                | MRCW010000000      |
|                                         | <i>Fusarium oxysporum</i> f. sp. <i>cepae</i> strain FoCFus2               | MRCU010000000      |
|                                         | <i>Fusarium oxysporum</i> f. sp. <i>cepae</i> strain FoC125                | MRCV010000000      |
|                                         | <i>Fusarium oxysporum</i> f. sp. <i>narcissi</i> strain N139               | MQTW010000000      |
|                                         | <i>Fusarium oxysporum</i> f. sp. <i>cubense</i> strain 160527              | SRMI010000000      |
|                                         | <i>Fusarium oxysporum</i> f. sp. <i>cubense</i> strain TR4 isolate UK0001  | VMNF010000000      |
|                                         | <i>Fusarium graminearum</i> PH-1                                           | NZ_AACM020000000   |
|                                         | <i>Dickeya dadantii</i> NCPPB 898 NCPPB898                                 | NZ_CM001976        |
|                                         | <i>Dickeya solani</i> A623-S20-A17                                         | NZ_JAIZGA010000001 |
|                                         | <i>Dickeya solani</i> Am3a                                                 | NZ_VZQK010000001   |
|                                         | <i>Dickeya solani</i> CH05026                                              | NZ_JAEKIO010000001 |
|                                         | <i>Dickeya solani</i> CH07044                                              | NZ_JAEKIP010000001 |
|                                         | <i>Dickeya solani</i> CH9635-1                                             | NZ_JAEKIM010000001 |
|                                         | <i>Dickeya solani</i> CH9918-774                                           | NZ_JAEKIN010000001 |
|                                         | <i>Dickeya solani</i> D12                                                  | NZ_PGUT010000001   |
|                                         | <i>Dickeya solani</i> Ds0432-1                                             | NZ_CP017453        |
|                                         | <i>Dickeya solani</i> F012                                                 | NZ_PDVN010000001   |
|                                         | <i>Dickeya solani</i> GBBC2040                                             | NZ_CM001860        |
|                                         | <i>Dickeya solani</i> IFB0099                                              | NZ_CP024711        |
| <i>Dickeya solani</i> IFB 0158          | NZ_PENA010000001                                                           |                    |
| <i>Dickeya solani</i> IFB0167           | NZ_CP051457                                                                |                    |
| <i>Dickeya solani</i> IFB0212           | NZ_JABAON010000001                                                         |                    |
| <i>Dickeya solani</i> IFB 0221          | NZ_PEMZ010000001                                                           |                    |
| <i>Dickeya solani</i> IFB0223           | NZ_CP024710                                                                |                    |
| <i>Dickeya solani</i> IFB0231           | NZ_CP051458                                                                |                    |
| <i>Dickeya solani</i> IFB0311           | NZ_JABAOO010000001                                                         |                    |
| <i>Dickeya solani</i> IFB0417           | CP051459                                                                   |                    |
| <i>Dickeya solani</i> IFB0421           | NZ_CP051460                                                                |                    |
| <i>Dickeya solani</i> IFB0487           | JABAOP010000001                                                            |                    |
| <i>Dickeya solani</i> IFB0695           | NZ_JABAOQ010000001                                                         |                    |
| <i>Dickeya solani</i> IPO2019           | NZ_CP071062                                                                |                    |
| <i>Dickeya solani</i> IPO2222           | NZ_CP015137                                                                |                    |
| <i>Dickeya solani</i> M21a              | NZ_VZQM010000001                                                           |                    |
| <i>Dickeya solani</i> MIE35             | NZ_VZQI010000001                                                           |                    |
| <i>Dickeya solani</i> MK10              | NZ_CM001839                                                                |                    |
| <i>Dickeya solani</i> MK16              | NZ_CM001842                                                                |                    |
| <i>Dickeya solani</i> PPO9019           | NZ_CP017454                                                                |                    |
| <i>Dickeya solani</i> PPO9134           | NZ_JWLT010000021                                                           |                    |
| <i>Dickeya solani</i> RNS05.1.2A Contig | NZ_JWMJ010000001                                                           |                    |
| <i>Dickeya solani</i> RNS07.7.3B        | NZ_JWLR010000001                                                           |                    |
| <i>Dickeya solani</i> RNS 08.23.3.1.A   | NZ_CP016928                                                                |                    |
| <i>Dickeya solani</i> RNS10-27-2A       | NZ_VZQJ010000001                                                           |                    |
| <i>Dickeya solani</i> Sp1a              | NZ_VZQL010000001                                                           |                    |
